# Supplementary material for: Molecular tuning of non-fullerene electron acceptors in organic photovoltaics: a theoretical study
Source: Royal Society of Chemistry journal article supplement (doi:10.1039/d2nj03608h), 2022-01-01
Supplement: d2nj03608h1.pdf [file d2nj03608h1.pdf]

## Supplementary Material

### Molecular tuning non-fullerene electron acceptor in organic photovoltaics: a theoretical study

Hai-Yuan Yu <sup>a</sup>, Cai-Rong Zhang <sup>a\*</sup>, Mei-Ling Zhang <sup>a</sup>, Xiao-Meng Liu <sup>a</sup>, Ji-Jun Gong  
<sup>a</sup>, Zi-Jiang Liu <sup>b</sup>, You-Zhi Wu <sup>c</sup>, Hong-Shan Chen <sup>d</sup>

<sup>a</sup> Department of Applied Physics, Lanzhou University of Technology, Lanzhou,  
Gansu 730050, China;

<sup>b</sup> School of Mathematics and Physics, Lanzhou Jiaotong University, Lanzhou 730070,  
China;

<sup>c</sup> School of Materials Science and Engineering, Lanzhou University of Technology,  
Lanzhou, Gansu 730050, China;

<sup>d</sup> College of Physics and Electronic Engineering, Northwest Normal University,  
Lanzhou, Gansu 730070, China.

\*Corresponding author.

E-mail address: [zhcrxy@lut.edu.cn](mailto:zhcrxy@lut.edu.cn) (C.R. Zhang)



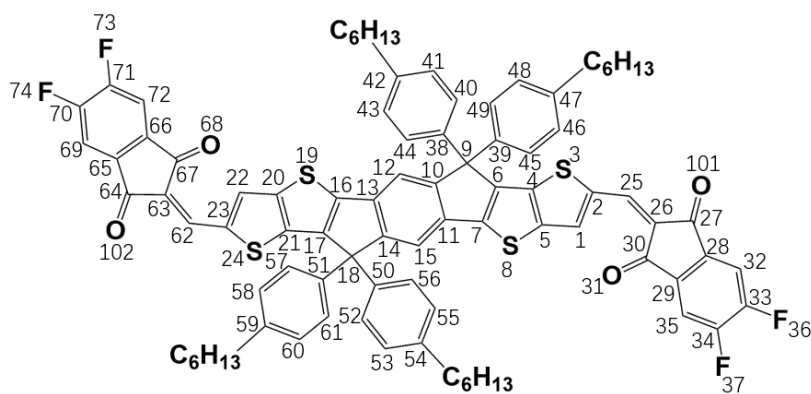

**IO-4F**

**Figure S1.** The molecular structures of PM6, IM-4F, IT-4F and IO-4F. The atomic serial numbers are also labeled in order to give geometrical parameters.

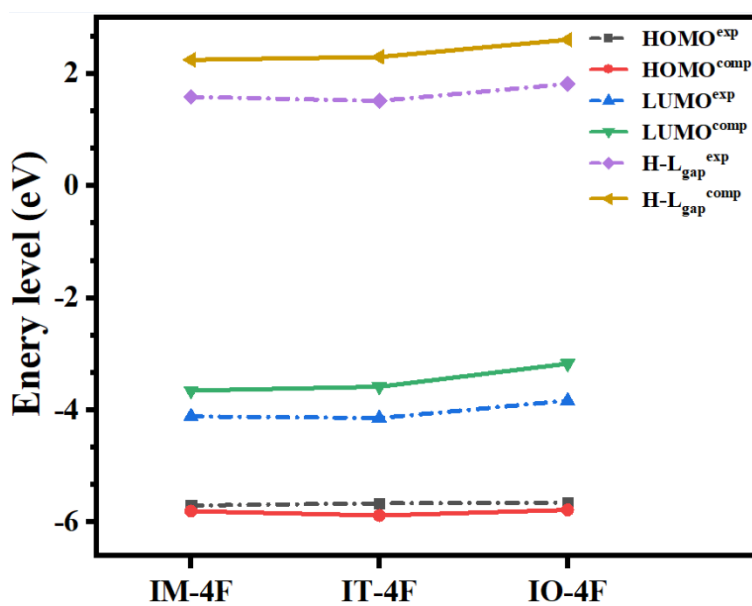

**Figure S2.** The comparisons of HOMO, LUMO, gap energy of IM-4F, IT-4F and IO-4F between the experiments (the superscript is exp) and calculations. (the superscript is comp).

PM6

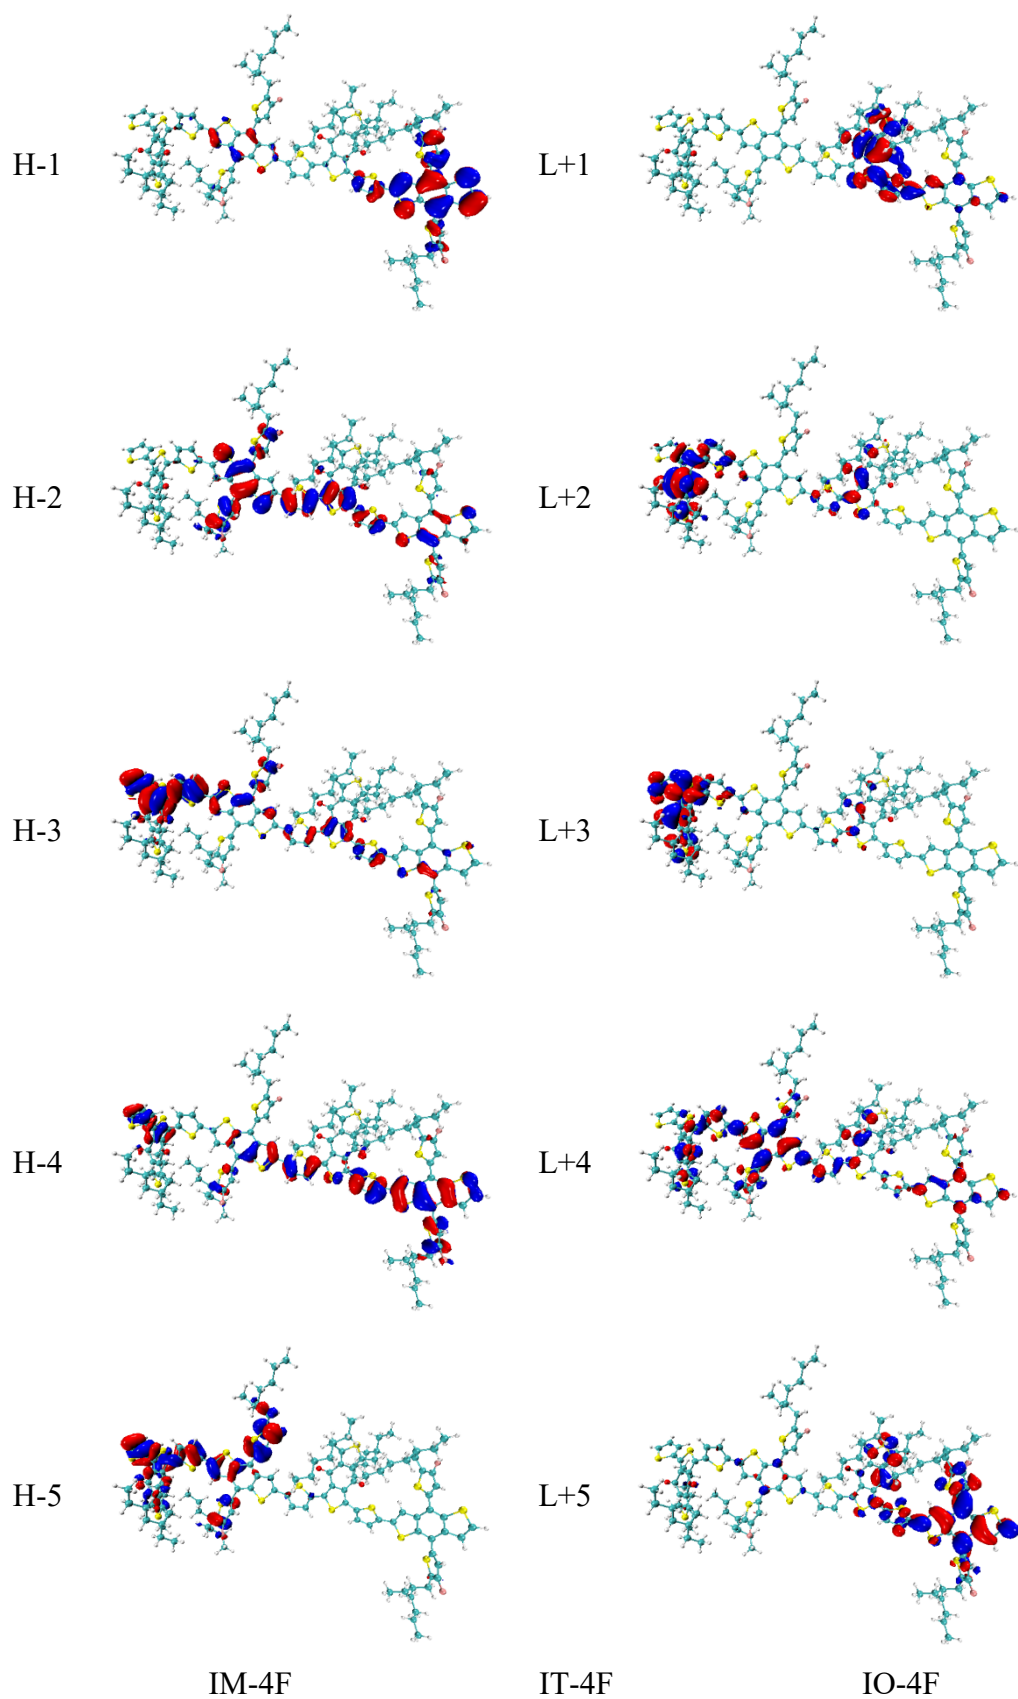

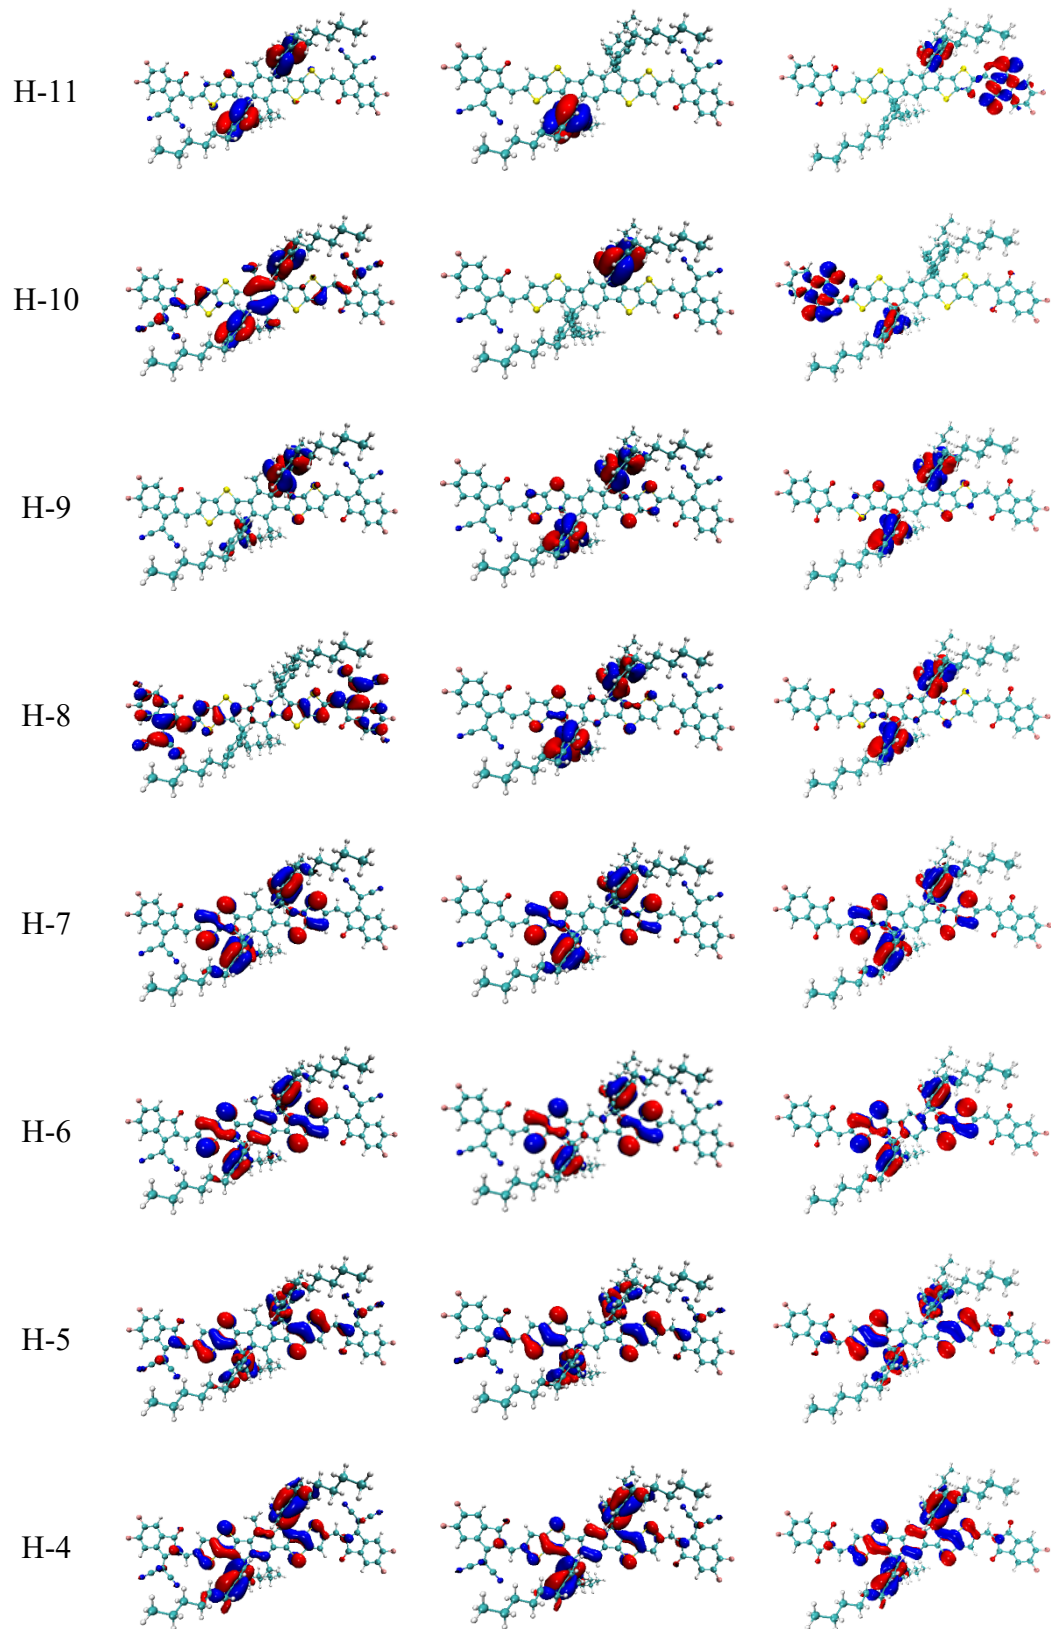

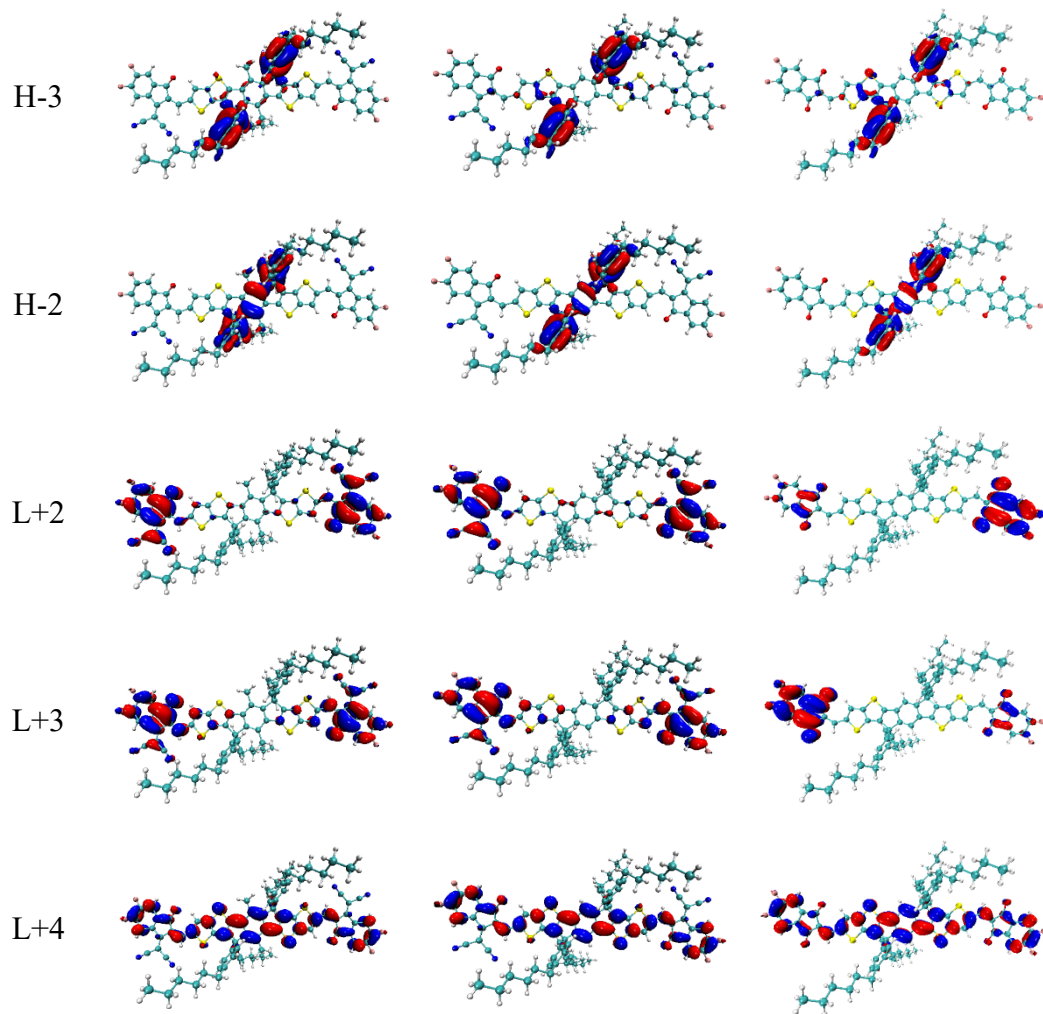

**Figure S3.** Selected frontier molecular orbitals for the PM6, IM-4F, IT-4F and IO-4F. (H = HOMO, L = LUMO; LC-PBE/ CEP-121G\*).

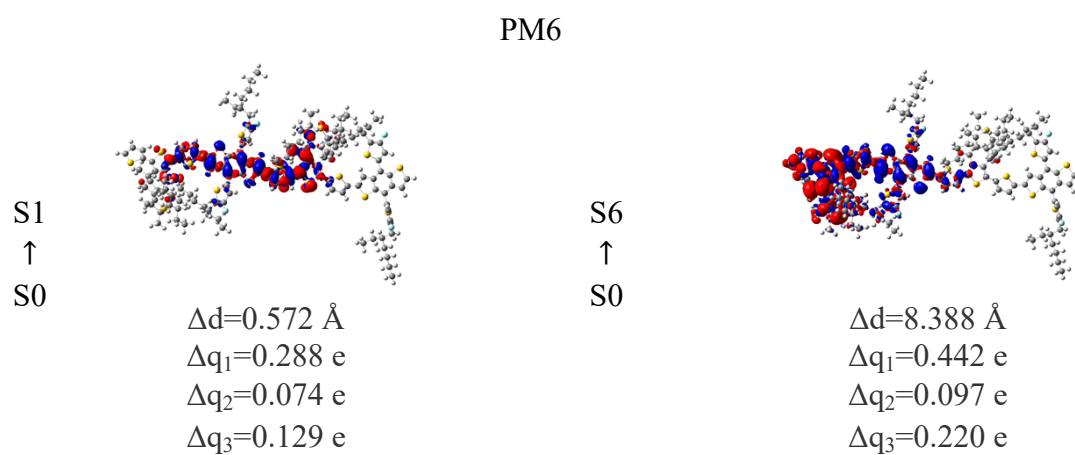

S2  
↑  
S0

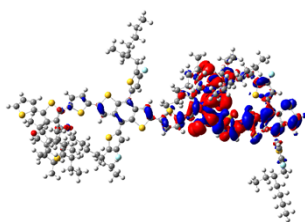

$\Delta d=2.518 \text{ \AA}$   
 $\Delta q_1=0.437 \text{ e}$   
 $\Delta q_2=0.072 \text{ e}$   
 $\Delta q_3=0.158 \text{ e}$

S3  
↑  
S0

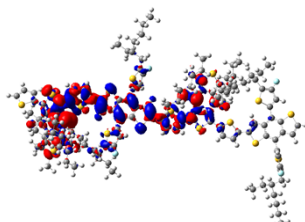

$\Delta d=2.920 \text{ \AA}$   
 $\Delta q_1=0.466 \text{ e}$   
 $\Delta q_2=0.072 \text{ e}$   
 $\Delta q_3=0.195 \text{ e}$

S4  
↑  
S0

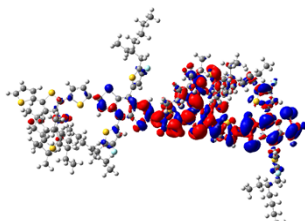

$\Delta d=5.517 \text{ \AA}$   
 $\Delta q_1=0.478 \text{ e}$   
 $\Delta q_2=0.163 \text{ e}$   
 $\Delta q_3=0.070 \text{ e}$

S5  
↑  
S0

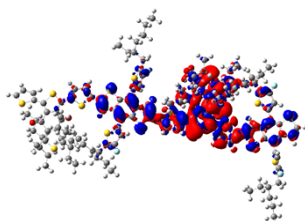

$\Delta d=5.168 \text{ \AA}$   
 $\Delta q_1=0.587 \text{ e}$   
 $\Delta q_2=0.079 \text{ e}$   
 $\Delta q_3=0.129 \text{ e}$

IM-4F

S7  
↑  
S0

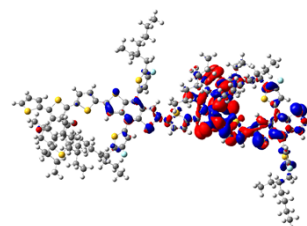

$\Delta d=2.202 \text{ \AA}$   
 $\Delta q_1=0.426 \text{ e}$   
 $\Delta q_2=0.151 \text{ e}$   
 $\Delta q_3=0.061 \text{ e}$

S8  
↑  
S0

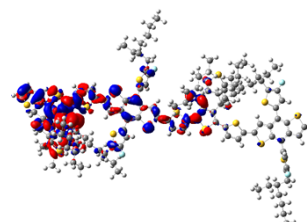

$\Delta d=1.805 \text{ \AA}$   
 $\Delta q_1=0.305 \text{ e}$   
 $\Delta q_2=0.043 \text{ e}$   
 $\Delta q_3=0.176 \text{ e}$

S9  
↑  
S0

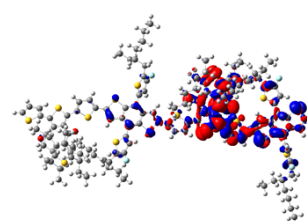

$\Delta d=2.396 \text{ \AA}$   
 $\Delta q_1=0.453 \text{ e}$   
 $\Delta q_2=0.054 \text{ e}$   
 $\Delta q_3=0.167 \text{ e}$

S10  
↑  
S0

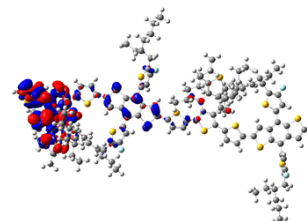

$\Delta d=2.372 \text{ \AA}$   
 $\Delta q_1=0.202 \text{ e}$   
 $\Delta q_2=0.029 \text{ e}$   
 $\Delta q_3=0.253 \text{ e}$

IT-4F

IO-4F



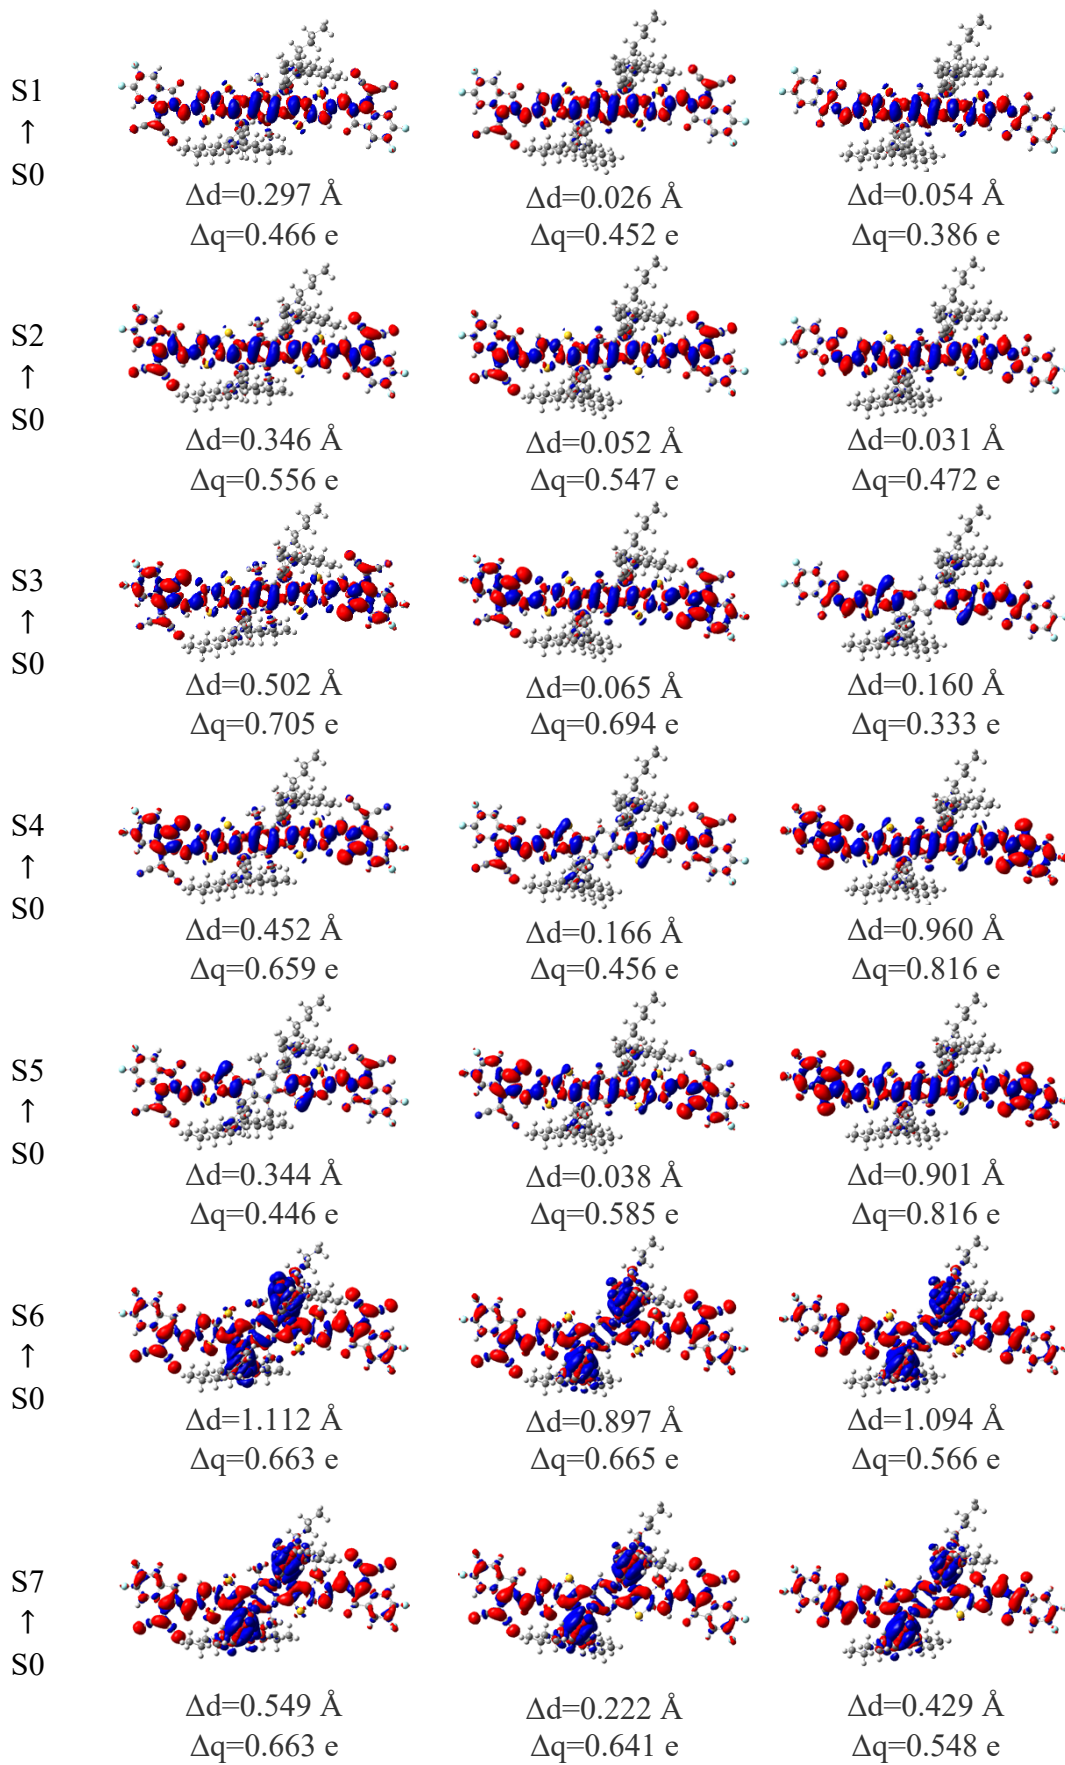



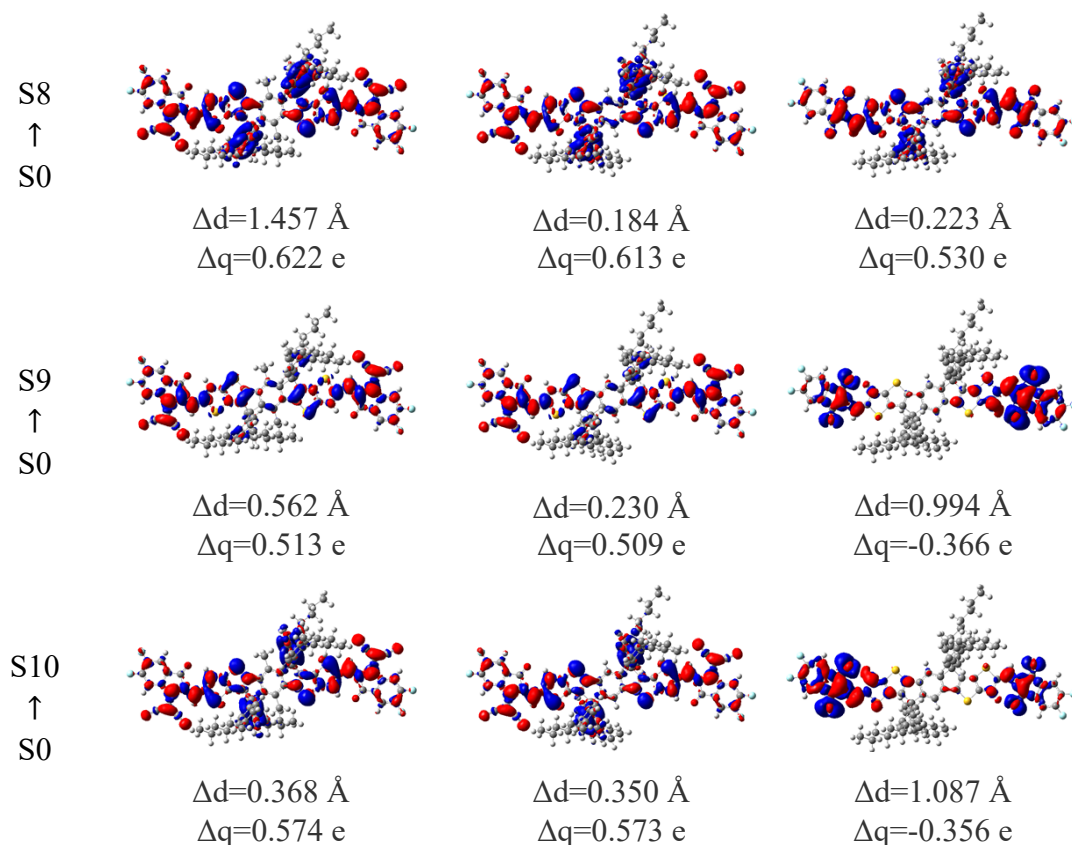

**Figure S4.** The charge density difference low-lying excited states for PM6 and NFAs IM-4F, IT-4F and IO-4F. The red and blue areas indicate the increase and decrease of electron density during excitation, respectively. The  $\Delta d$  represent charge transfer distance. The  $\Delta q_1$ ,  $\Delta q_2$  and  $\Delta q_3$  represent the transferred charges from the donor fragment to the acceptor fragment, from the donor fragment to the thiophene fragment and from the thiophene fragment to the acceptor fragment, respectively. (LC-PBE/CEP-121G\*).

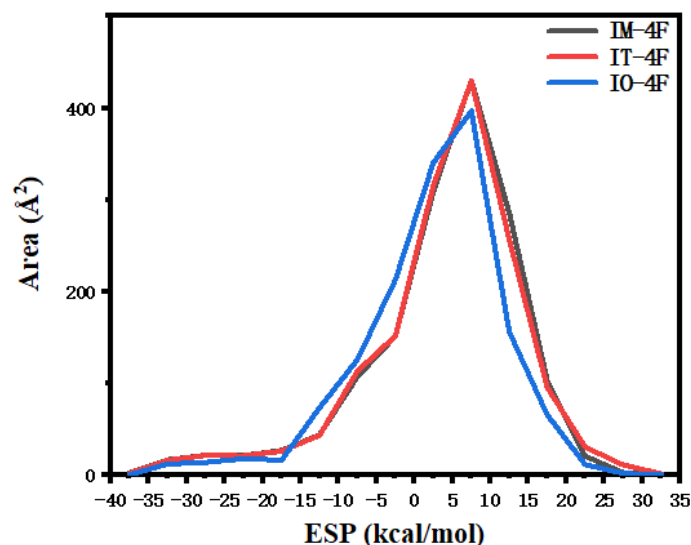

**Figure S5.** Statistics of the ESP distribution on molecular surface of IM-4F, IT-4F and IO-4F.

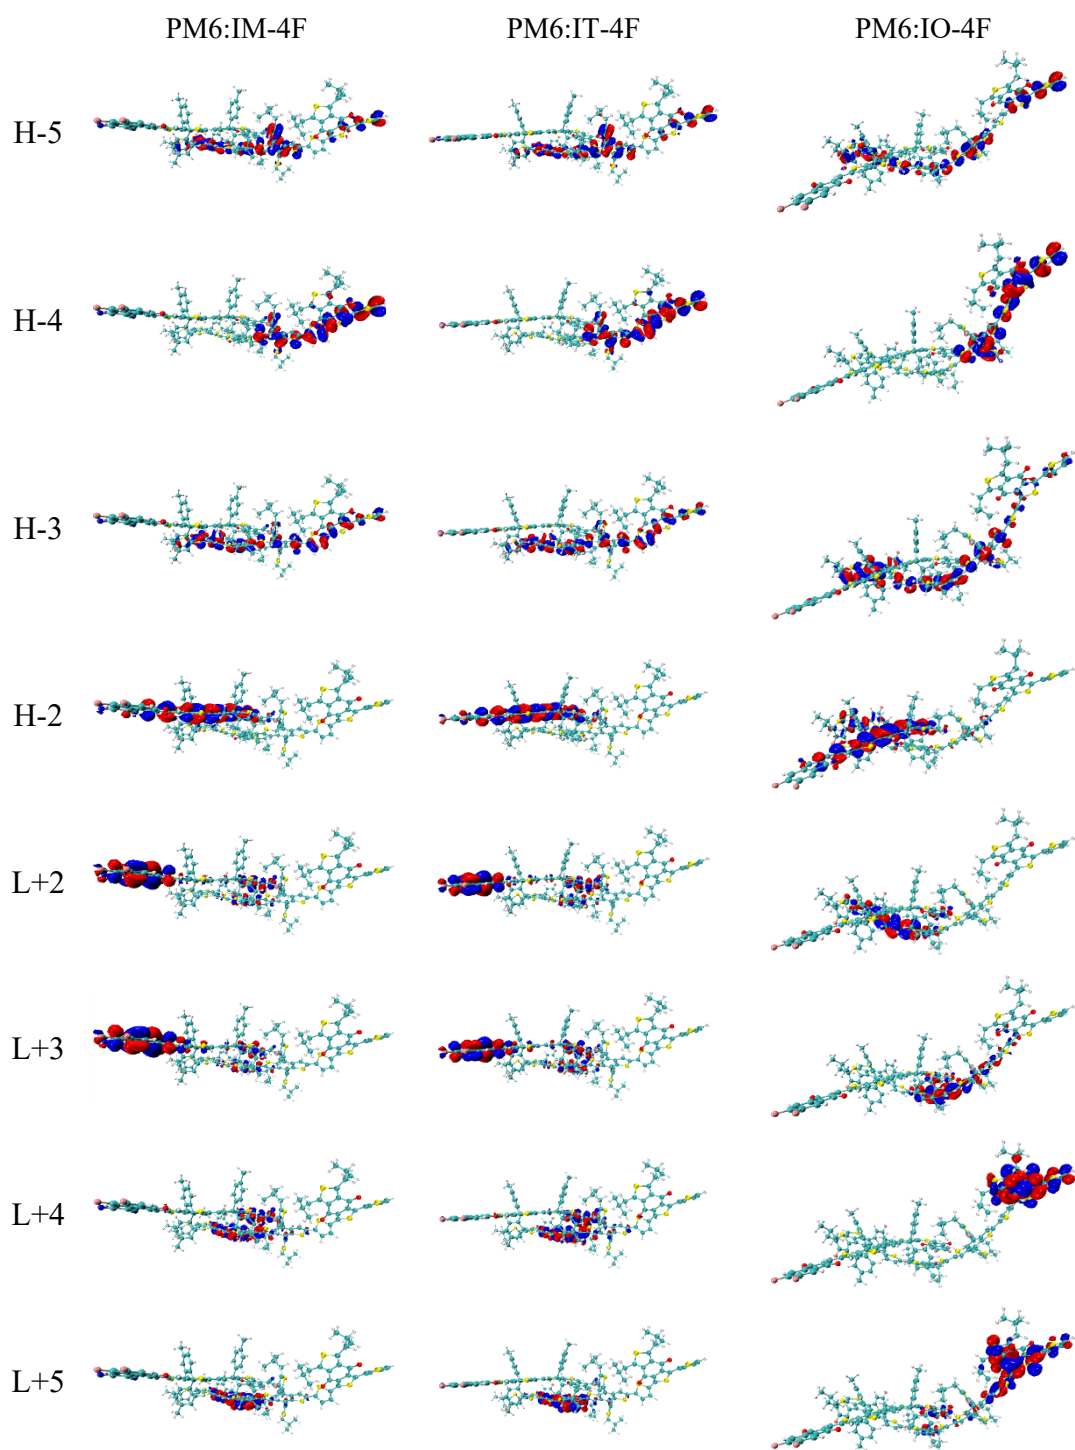

**Figure S6.** Selected frontier molecular orbitals for four complex molecules. (H = HOMO, L = LUMO, LC-PBE/ CEP-121G\*).

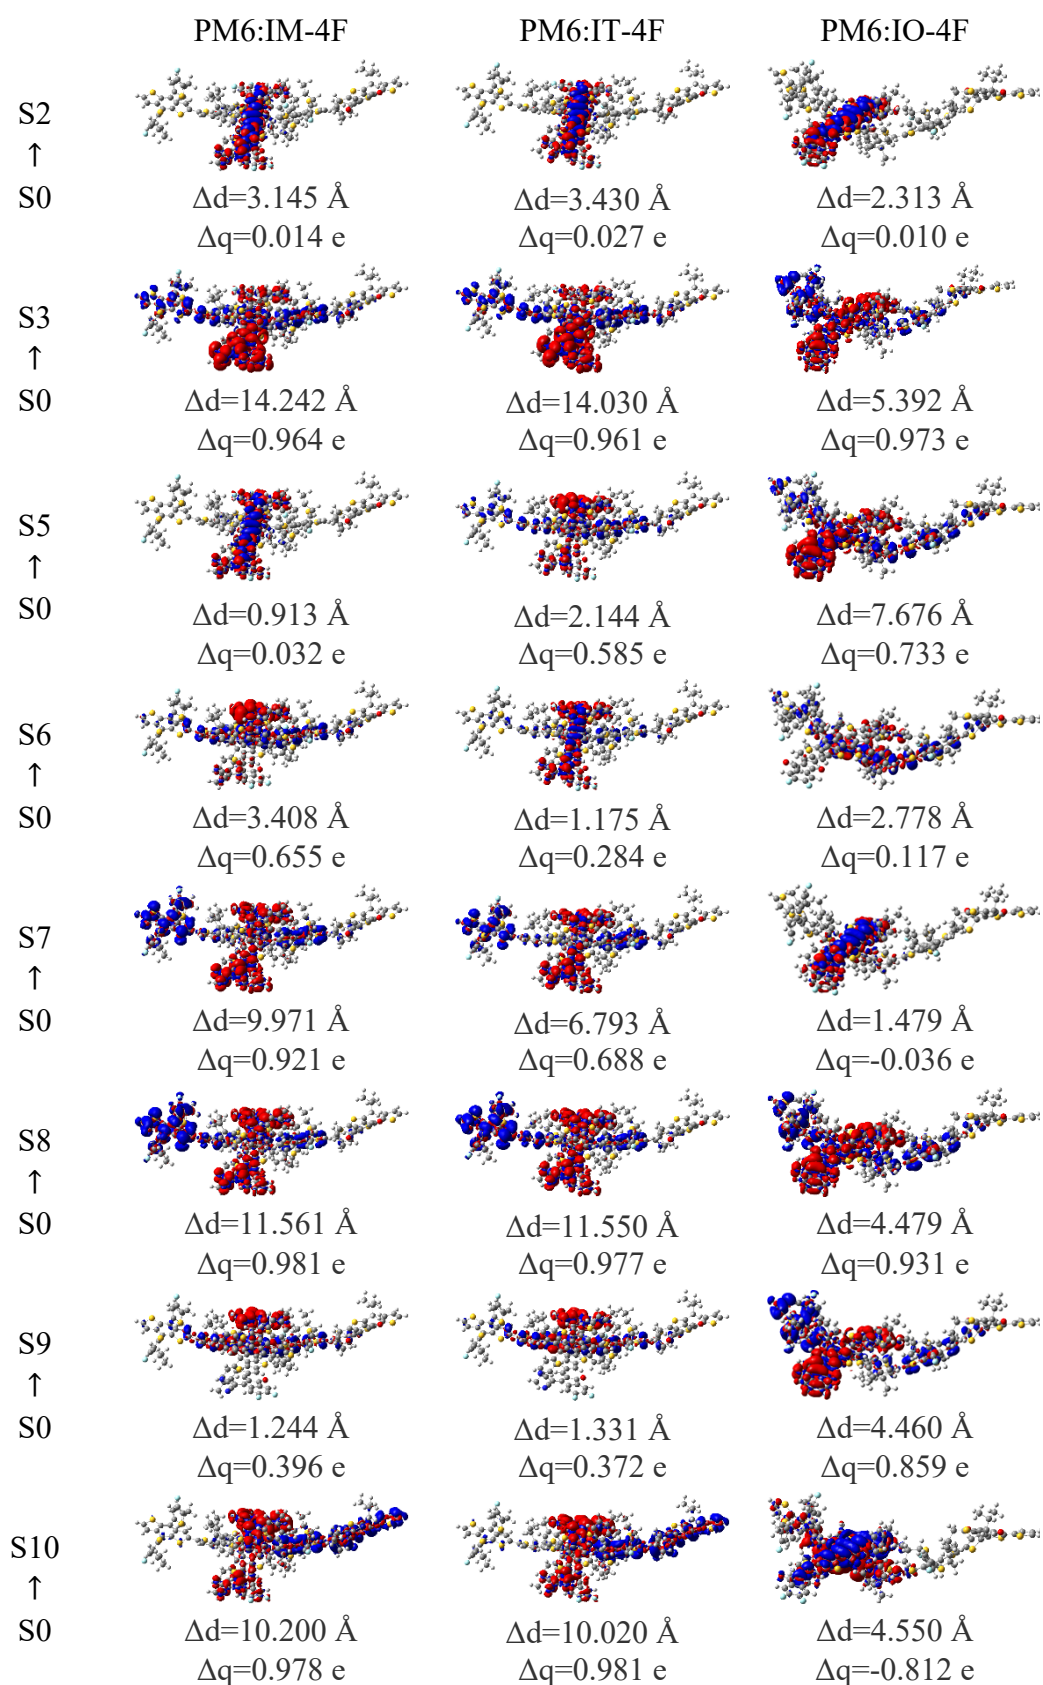

**Figure S7.** The charge density difference of the excited state of the complex. The red and blue areas indicate the increase and decrease of electron density during the excitation process.  $\Delta d$  represent the charge transfer distance.  $\Delta q$  represent the amount of charge transfer from the donor to acceptor.

*Full chemical names of materials:*

**PM6:** Poly[(2,6-(4,8-bis(5-(2-ethylhexyl-3-fluoro)thiophen-2-yl)-benzo[1,2-b:4,5-b']dithiophene))-alt-(5,5-(1',3'-di-2-thienyl-5',7'-bis(2-ethylhexyl)benzo[1',2'-c:4',5'-c']dithiophene-4,8-dione)];

**IM-4F:** 3,9-bis(2-methylene-((3-(1,1-dicyanomethylene)-6,7-difluoro)-indanone))-5,5,11,11-tetrakis(4-hexylphenyl)-1,4-dimethyl-dithieno[2,3-d:2',3'-d']-s-indaceno[1,2-b:5,6-b']dithiophene;

**IT-4F:** 3,9-bis(2-methylene-((3-(1,1-dicyanomethylene)-6,7-difluoro)-indanone))-5,5,11,11-tetrakis(4-hexylphenyl)-dithieno[2,3-d:2',3'-d']-s-indaceno[1,2-b:5,6-b']dithiophene;

**IO-4F:** 3,9-bis[5,6-difluo-1H-indene-1,3(2H)-dione]-5,5,11,11-tetrakis(4-hexylphenyl)-dithieno[2,3-d:2',3'-d']-s-indaceno[1,2-b:5,6-b']dithiophene

The initial and final states of the CT, ED and CR processes are DA and D<sup>+</sup>A<sup>-</sup>, DA\* and D<sup>+</sup>A<sup>-</sup>, D<sup>+</sup>A<sup>-</sup> and DA, respectively, where DA is the ground state of the complex, D<sup>+</sup>A<sup>-</sup> is the lowest charge transfer state and DA\* is the lowest localized excited state.

**Table S1.** The calculated of range of the simulated absorption spectrum of the complex, the energy difference between acceptor-centered local excitation and charge transfer, the rates of exciton dissociation, experimental open-circuit voltage ( $V_{OC}$ ), short-circuit current ( $J_{SC}$ ), fill factor (FF) and power conversion efficiency (PCE) for the three OPVs.

|                                 | PM6:IM-4F             | PM6:IT-4F             | PM6:IO-4F             |
|---------------------------------|-----------------------|-----------------------|-----------------------|
| Absorption region               | 440.97-904.46         | 440.97-885.28         | 407.75-777.97         |
| $\Delta_{ALE-CT}$               | 0.19                  | 0.26                  | 0.14                  |
| $K_{ED}$                        | $6.26 \times 10^{12}$ | $1.66 \times 10^{12}$ | $8.30 \times 10^{13}$ |
| $V_{OC}$ (V)                    | 0.879                 | 0.856                 | 1.260                 |
| $J_{SC}$ (mA cm <sup>-2</sup> ) | 21.91                 | 20.34                 | 9.22                  |
| FF (%)                          | 73.10                 | 74.90                 | 68.00                 |
| PCE (%)                         | 14.08                 | 13.00                 | 7.85                  |

**Table S2.** The calculated at the LC-PBE/CEP-121G\* level after gas phase optimization volume, polarization, static  $\epsilon_s$  and dynamic  $\epsilon_d$  dielectric constants for

|       | PM6, IM-4F, IT-4F and IO-4F. |                               |              |              |
|-------|------------------------------|-------------------------------|--------------|--------------|
|       | V (Bohr <sup>3</sup> )       | $\alpha$ (Bohr <sup>3</sup> ) | $\epsilon_s$ | $\epsilon_d$ |
| PM6   | 12508.6                      | 1444.0                        | 3.1          | 3.0          |
| IM-4F | 11541.1                      | 1260.5                        | 3.8          | 3.4          |
| IT-4F | 20207.3                      | 1987.0                        | 3.8          | 3.4          |
| IO-4F | 12259.9                      | 1414.6                        | 3.5          | 3.4          |

**Table S3.** The selected bond length (in Å), bond angles and dihedral angles (in°) for the optimized four monomers in the gas phase. ( $\omega$ B97XD/CEP-121G\*).

| Definition | Bond length | Definition  | Bond angles | Definition      | Dihedral angles |
|------------|-------------|-------------|-------------|-----------------|-----------------|
| PM6        |             |             |             |                 |                 |
| 38-47      | 1.512       | 38-47-48    | 114.5       | 27-26-29-30     | -149.7          |
| 47-48      | 1.563       | 39-40-45    | 120.6       | 26-27-34-41     | -15.0           |
| 40-45      | 1.512       | 40-45-46    | 116.8       | 24-28-37-42     | 16.3            |
| 45-46      | 1.555       | 35-34-41    | 122.9       | 36-30-45-46     | 122.4           |
| 34-41      | 1.228       | 36-37-42    | 124.0       | 35-38-48-47     | -113.8          |
| 37-42      | 1.227       | 27-26-29    | 134.2       | 21-22-24-28     | -138.9          |
| 26-29      | 1.471       | 22-24-28    | 130.4       | 23-19-12-75     | 143.4           |
| 22-24      | 1.470       | 12-19-23    | 117.5       | 5-1-6-7         | -129.3          |
| 12-19      | 1.466       | 19-12-75    | 122.4       | 1-2-3-76        | -177.8          |
| 1-6        | 1.483       | 1-6-11      | 121.6       | 5-4-43-44       | 62.4            |
| 3-76       | 1.355       | 2-1-6       | 127.8       | 8-9-14-15       | 60.7            |
| 4-43       | 1.511       | 2-3-76      | 120.9       | 10-9-14-18      | 64.2            |
| 43-44      | 1.549       | 3-4-43      | 127.1       | 14-15-14-77     | -178.8          |
| 9-14       | 1.483       | 4-43-44     | 117.6       | 16-17-49-50     | 107.9           |
| 16-77      | 1.353       | 8-9-14      | 120.4       | 18-17-49-50     | -68.7           |
| 17-49      | 1.508       | 9-14-15     | 127.5       | 72-13-109-108   | 146.5           |
| 49-50      | 1.552       | 15-16-17    | 121.2       | 107-106-103-104 | -153.7          |
| 13-109     | 1.465       | 16-17-49    | 128.3       | 103-104-111-118 | -16.7           |
| 103-106    | 1.469       | 17-49-50    | 113.8       | 101-105-114-119 | 16.5            |
| 111-118    | 1.229       | 74-13-109   | 120.3       | 112-115-124-125 | 90.1            |
| 114-119    | 1.227       | 110-106-103 | 125.1       | 113-117-122-123 | 121.1           |
| 115-124    | 1.512       | 104-111-118 | 122.4       | 98-99-101-102   | 52.1            |
| 124-125    | 1.563       | 105-114-119 | 121.4       | 97-96-89-149    | 143.3           |
| 117-122    | 1.511       | 115-124-125 | 114.6       | 84-83-78-82     | -129.4          |
| 122-123    | 1.557       | 117-122-123 | 116.5       | 78-79-80-153    | -177.8          |
| 99-101     | 1.470       | 105-101-99  | 130.0       | 82-81-120-121   | 62.7            |
| 89-96      | 1.467       | 89-96-97    | 131.6       | 86-86-91-92     | 65.0            |
| 86-91      | 1.484       | 87-86-91    | 122.1       | 85-86-91-95     | -113.6          |
| 93-154     | 1.354       | 86-91-92    | 127.6       | 91-92-93-154    | -178.7          |
| 94-126     | 1.508       | 92-93-154   | 121.2       | 93-94-126-127   | 109.1           |
| 126-127    | 1.552       | 94-126-127  | 113.6       | 80-81-120-121   | -125.0          |
| 78-83      | 1.483       | 78-83-84    | 121.9       | 120-81-80-153   | 5.6             |
| 80-153     | 1.355       | 79-80-153   | 120.9       | 79-78-83-88     | -129.2          |
| 81-120     | 1.511       | 81-120-121  | 117.6       |                 |                 |
| 120-121    | 1.549       |             |             |                 |                 |
| Definition | Bond length | Definition  | Bond angles | Definition      | Dihedral angles |
| IM-4F      |             |             |             |                 |                 |

|       |       |          |       |             |        |
|-------|-------|----------|-------|-------------|--------|
| 34-37 | 1.341 | 34-35-38 | 118.8 | 37-34-35-38 | 0.0    |
| 35-38 | 1.341 | 35-34-37 | 118.3 | 38-35-36-29 | -180.0 |
| 30-32 | 1.223 | 30-29-36 | 126.6 | 37-34-33-28 | -180.0 |
| 27-31 | 1.376 | 29-30-32 | 124.3 | 28-27-31-79 | 0.7    |
| 31-79 | 1.442 | 26-27-31 | 128.7 | 27-31-79-80 | 176.8  |
| 79-80 | 1.161 | 28-27-31 | 124.1 | 26-27-31-81 | 0.7    |
| 31-81 | 1.442 | 27-31-79 | 123.2 | 27-31-81-82 | 176.3  |
| 81-82 | 1.612 | 31-79-80 | 178.1 | 36-29-30-32 | 0.3    |
| 25-26 | 1.379 | 31-81-82 | 178.3 | 25-26-30-32 | -1.5   |
| 2-25  | 1.434 | 25-26-27 | 125.0 | 25-26-27-31 | 2.1    |
| 9-39  | 1.541 | 2-25-26  | 133.1 | 2-25-26-27  | 179.9  |
| 9-40  | 1.548 | 1-2-25   | 133.2 | 2-25-26-30  | 0.7    |
| 12-78 | 1.514 | 3-2-25   | 115.1 | 1-2-25-26   | 1.6    |
| 15-77 | 1.514 | 1-5-8    | 133.3 | 3-2-25-26   | -178.8 |
| 29-30 | 1.492 | 3-4-6    | 136.3 | 6-9-39-41   | 81.6   |
| 27-28 | 1.496 | 8-7-11   | 135.3 | 6-9-40-46   | -149.2 |
| 26-27 | 1.482 | 4-6-9    | 136.7 | 10-9-39-41  | -168.6 |
| 1-2   | 1.397 | 9-39-41  | 120.4 | 10-9-40-46  | 101.5  |
| 5-8   | 1.760 | 9-40-46  | 122.7 | 10-11-15-77 | -177.8 |
| 6-7   | 1.375 | 10-12-78 | 123.1 | 14-13-12-78 | -177.9 |
| 14-18 | 1.548 | 11-15-77 | 121.1 | 14-18-51-53 | -167.1 |
| 13-16 | 1.468 | 15-14-18 | 127.8 | 14-18-51-57 | 19.5   |
| 18-51 | 1.540 | 12-13-16 | 130.0 | 17-18-52-58 | 34.1   |
| 18-52 | 1.549 | 18-51-53 | 120.6 | 17-18-52-62 | -150.0 |
| 51-53 | 1.404 | 18-52-58 | 119.2 | 24-23-63-64 | -178.4 |
| 52-58 | 1.405 | 17-21-24 | 136.2 | 22-23-63-64 | 2.2    |
| 17-21 | 1.421 | 19-20-22 | 133.4 | 23-63-64-65 | 179.8  |
| 16-19 | 1.752 | 24-23-63 | 115.1 | 23-63-64-68 | 0.8    |
| 21-24 | 1.728 | 23-63-64 | 133.1 | 63-64-68-68 | -2.0   |
| 23-63 | 1.434 | 63-64-65 | 125.0 | 66-71-72-76 | 180.0  |
| 63-64 | 1.379 | 64-68-69 | 129.3 | 67-74-73-75 | -180.0 |
| 64-65 | 1.482 | 74-73-75 | 120.6 | 64-65-70-85 | 0.6    |
| 64-68 | 1.492 | 71-72-76 | 119.5 | 65-70-85-86 | 176.7  |
| 68-69 | 1.224 | 72-73-75 | 118.8 | 66-65-70-83 | 0.7    |
| 65-70 | 1.376 | 73-72-76 | 118.3 | 65-70-83-84 | 177.2  |
| 70-83 | 1.442 | 70-83-84 | 178.1 | 71-72-73-75 | -180.0 |
| 83-84 | 1.616 | 65-70-85 | 124.5 | 74-73-72-76 | -179.9 |
| 70-85 | 1.442 | 70-85-86 | 178.3 | 75-73-72-76 | 0.0    |
| 85-86 | 1.162 | 66-65-70 | 124.1 | 69-68-67-74 | 0.4    |
| 72-76 | 1.341 | 65-70-83 | 123.1 |             |        |
| 73-75 | 1.341 |          |       |             |        |

| Definition | Bond length | Definition | Bond angles | Definition | Dihedral angles |
|------------|-------------|------------|-------------|------------|-----------------|
|------------|-------------|------------|-------------|------------|-----------------|

IT-4F



|       |       |          |       |             |        |
|-------|-------|----------|-------|-------------|--------|
| 34-37 | 1.341 | 34-35-38 | 118.8 | 33-34-35-38 | -180.0 |
| 35-38 | 1.341 | 35-34-37 | 118.3 | 36-35-34-37 | -180.0 |
| 27-31 | 1.376 | 33-34-37 | 119.5 | 37-34-35-38 | 0.0    |
| 31-77 | 1.442 | 36-35-38 | 120.6 | 36-29-30-32 | 0.5    |
| 77-78 | 1.161 | 29-30-32 | 124.3 | 28-27-31-77 | 0.6    |
| 31-79 | 1.442 | 27-28-33 | 131.7 | 27-31-77-78 | 179.0  |
| 79-80 | 1.162 | 28-27-31 | 124.1 | 26-27-31-79 | 0.6    |
| 30-32 | 1.223 | 27-31-77 | 123.2 | 27-31-79-80 | 177.1  |
| 25-26 | 1.378 | 31-77-78 | 178.1 | 25-26-30-32 | -2.2   |
| 2-25  | 1.435 | 27-31-79 | 124.5 | 25-26-27-31 | 3.0    |
| 9-39  | 1.542 | 31-79-80 | 178.3 | 1-2-25-26   | 2.4    |
| 9-40  | 1.539 | 30-26-25 | 127.6 | 2-1-5-8     | 180.0  |
| 18-51 | 1.543 | 2-25-26  | 133.1 | 8-7-11-15   | -1.2   |
| 18-52 | 1.539 | 1-2-25   | 133.2 | 6-9-40-46   | 18.1   |
| 23-63 | 1.435 | 1-5-8    | 133.4 | 10-9-39-41  | -164.1 |
| 63-64 | 1.378 | 3-4-6    | 136.1 | 14-18-51-53 | -162.3 |
| 65-70 | 1.376 | 6-9-39   | 107.7 | 17-18-52-58 | 15.3   |
| 70-81 | 1.442 | 10-9-40  | 108.9 | 16-17-21-24 | 179.8  |
| 81-82 | 1.616 | 14-18-51 | 113.2 | 23-63-64-65 | -179.5 |
| 70-83 | 1.442 | 17-18-52 | 113.3 | 63-64-68-69 | 0.8    |
| 83-84 | 1.162 | 19-20-22 | 133.4 | 64-65-70-83 | -0.3   |
| 68-69 | 1.223 | 23-63-64 | 133.1 | 65-70-83-84 | 180.0  |
| 16-19 | 1.747 | 65-70-83 | 124.5 | 66-65-70-81 | -0.2   |
| 21-24 | 1.727 | 70-83-84 | 178.2 | 65-70-81-82 | -178.8 |
| 64-65 | 1.483 | 65-70-81 | 123.2 | 66-71-72-76 | -180.0 |
| 66-67 | 1.402 | 70-81-82 | 178.1 | 67-74-73-75 | 180.0  |
| 72-73 | 1.406 | 72-73-75 | 118.8 | 75-73-72-76 | 0.0    |
| 72-76 | 1.341 | 73-72-76 | 118.3 |             |        |
| 73-75 | 1.341 |          |       |             |        |

| Definition | Bond length | Definition | Bond angles | Definition   | Dihedral angles |
|------------|-------------|------------|-------------|--------------|-----------------|
| IO-4F      |             |            |             |              |                 |
| 33-36      | 1.343       | 33-34-37   | 118.2       | 36-33-34-37  | 0.0             |
| 34-37      | 1.343       | 34-33-36   | 118.2       | 36-33-32-28  | 180.0           |
| 27-101     | 1.220       | 29-30-31   | 124.3       | 37-34-35-29  | -180.0          |
| 30-31      | 1.225       | 28-27-101  | 126.2       | 31-30-29-35  | 0.1             |
| 25-26      | 1.366       | 26-27-101  | 127.4       | 32-28-27-101 | 0.0             |
| 2-25       | 1.438       | 26-30-31   | 129.8       | 25-26-30-31  | -0.3            |
| 9-38       | 1.541       | 2-25-26    | 131.8       | 25-26-27-101 | 0.2             |
| 9-39       | 1.540       | 1-2-25     | 130.8       | 2-25-26-30   | 0.4             |
| 6-9        | 1.525       | 3-2-25     | 117.0       | 2-25-26-27   | -179.9          |
| 9-10       | 1.542       | 1-5-8      | 133.5       | 1-2-25-26    | 1.1             |
| 5-8        | 1.762       | 3-4-6      | 136.1       | 3-2-25-26    | -179.4          |
| 3-4        | 1.731       | 8-7-11     | 134.9       | 3-4-5-8      | 180.0           |

|        |       |           |       |              |        |
|--------|-------|-----------|-------|--------------|--------|
| 2-3    | 1.777 | 4-6-9     | 137.2 | 7-6-9-38     | 119.5  |
| 7-8    | 1.747 | 6-9-38    | 108.2 | 7-6-9-39     | -114.8 |
| 12-13  | 1.401 | 6-9-39    | 112.8 | 10-9-38-40   | -163.8 |
| 14-18  | 1.542 | 10-9-38   | 113.6 | 10-9-39-49   | 83.9   |
| 17-18  | 1.525 | 10-9-39   | 108.6 | 14-13-16-19  | 177.8  |
| 18-50  | 1.542 | 14-18-50  | 113.3 | 15-1-18-50   | 65.3   |
| 18-51  | 1.539 | 17-18-51  | 113.1 | 17-18-51-57  | 15.9   |
| 16-19  | 1.747 | 14-18-51  | 108.9 | 18-17-21-24  | -2.8   |
| 19-20  | 1.762 | 17-18-50  | 108.0 | 12-13-16-19  | -2.1   |
| 21-24  | 1.731 | 17-21-24  | 136.1 | 20-22-23-62  | 179.8  |
| 23-24  | 1.777 | 19-20-22  | 133.5 | 22-23-62-63  | -0.4   |
| 23-62  | 1.438 | 22-23-62  | 130.8 | 23-62-63-64  | -179.9 |
| 62-63  | 1.366 | 23-62-63  | 131.8 | 23-62-63-67  | -0.2   |
| 63-64  | 1.499 | 63-67-68  | 129.8 | 62-63-67-68  | 0.6    |
| 63-67  | 1.488 | 63-64-102 | 127.4 | 62-63-64-102 | -0.4   |
| 64-102 | 1.220 | 72-71-73  | 120.2 | 65-69-70-74  | -180.0 |
| 67-68  | 1.225 | 70-71-73  | 118.2 | 66-72-71-73  | 180.0  |
| 70-74  | 1.343 | 71-70-74  | 118.2 |              |        |
| 71-73  | 1.343 |           |       |              |        |

**Table S4.** The absorption peak wavelength and energy of donor PM6 and acceptor IM-4F, IT-4F, IO-4F.

|       | Experimental (nm/eV) | Theoretical (nm/eV) | Difference (eV) |
|-------|----------------------|---------------------|-----------------|
| PM6   | 570.00/2.175         | 500.61/2.477        | 0.302           |
| IM-4F | 763.00/1.625         | 696.54/1.780        | 0.155           |
| IT-4F | 723.13/1.715         | 678.95/1.826        | 0.111           |
| IO-4F | 607.79/2.040         | 600.18/2.066        | 0.026           |

**Table S5.** Electronic transition energies (eV), excitation wavelengths (nm), corresponding oscillator strengths ( $f$ ), and main transition configurations for four monomer molecules. CT represent the charge transfer from the donor segment to the acceptor segment. DLE and ALE represent the local excitation that occurs on the donor segment and the acceptor segment. (In the solid phase, LC-PBE/CEP-121G\*).

| States                                                       | Main transition configurations            | ESC    | E (eV/nm)     | $f$    |
|--------------------------------------------------------------|-------------------------------------------|--------|---------------|--------|
| PM6 ( $\omega=0.118$ , $\epsilon_s=3.1$ , $\epsilon_d=3.0$ ) |                                           |        |               |        |
| S2                                                           | H-1→L+1 (33%); H→L+1 (42%)                | CT     | 2.6692/464.5  | 0.1717 |
| S3                                                           | H→L+2 (56%); H→L+3 (11%)                  | CT     | 2.7174/456.27 | 0.0218 |
| S4                                                           | H-1→L (62%); H-1→L+2 (11%)                | CT     | 2.8403/436.52 | 0.1326 |
| S5                                                           | H-1→L+1 (57%); H→L+1 (28%)                | CT     | 2.8805/430.42 | 0.0364 |
| S6                                                           | H-3→L+3 (10%); H→L+2 (10%)                | ALE&CT | 2.8936/428.48 | 0.1365 |
| S8                                                           | H-3→L (36%); H-3→L+2 (19%); H-2→L+2 (15%) | CT&LE  | 3.0747/403.24 | 0.0789 |

|                                                                |                                                               |        |               |        |
|----------------------------------------------------------------|---------------------------------------------------------------|--------|---------------|--------|
|                                                                | H→L+2 (10%)                                                   |        |               |        |
| S9                                                             | H-4→L+1 (17%); H-3→L+1 (12%)                                  | CT     | 3.1237/396.92 | 0.1437 |
| S10                                                            | H-3→L+3 (23%)                                                 | LE&CT  | 3.1377/395.14 | 0.1073 |
| S12                                                            | H-1→L+2 (28%); H→L+4 (20%)                                    | CT&LE  | 3.215/385.65  | 0.1286 |
| S13                                                            | H-2→L+1 (17%); H-1→L+5 (24%)                                  | DLE&CT | 3.236/383.14  | 0.0727 |
| S14                                                            | H→L+4 (11%)                                                   | LE     | 3.2437/382.23 | 0.0516 |
| IM-4F ( $\omega=0.118, \varepsilon_s=3.8, \varepsilon_d=3.4$ ) |                                                               |        |               |        |
| S2                                                             | H→L+1 (98%)                                                   | CT&DLE | 2.0862/594.31 | 0.0038 |
| S4                                                             | H-1→L (16%); H→L+3 (78%)                                      | CT&DLE | 2.5194/492.11 | 0.0003 |
| S5                                                             | H-1→L (81%); H→L+3 (15%)                                      | DLE&CT | 2.5535/485.54 | 0.0032 |
| S6                                                             | H-2→L (93%)                                                   | CT     | 2.6607/465.99 | 0.0408 |
| S7                                                             | H-3→L (87%)                                                   | CT     | 2.7105/457.43 | 0.0005 |
| S10                                                            | H-5→L (70%); H-4→L+1 (13%)                                    | CT     | 2.8213/439.45 | 0.0051 |
| S11                                                            | H-6→L (71%)                                                   | CT&DLE | 2.935/422.43  | 0.0563 |
| S12                                                            | H-2→L+1 (79%)                                                 | CT     | 2.946/420.86  | 0.0008 |
| S13                                                            | H-3→L+1 (84%)                                                 | CT     | 3.0231/410.12 | 0.0015 |
| S14                                                            | H-7→L (66%); H-6→L+1 (17%)                                    | CT     | 3.039/407.98  | 0.0003 |
| S15                                                            | H-5→L (15%); H-4→L+1 (79%)                                    | CT&DLE | 3.1043/399.4  | 0.0005 |
| IT-4F ( $\omega=0.118, \varepsilon_s=3.8, \varepsilon_d=3.4$ ) |                                                               |        |               |        |
| S2                                                             | H→L+1 (97%)                                                   | CT&DLE | 2.1387/579.73 | 0.0006 |
| S4                                                             | H-1→L (76%); H→L+3 (19%)                                      | DLE&CT | 2.553/485.63  | 0.0003 |
| S5                                                             | H-1→L (19%); H→L+3 (71%)                                      | CT&DLE | 2.5812/480.33 | 0.0005 |
| S6                                                             | H-2→L (88%)                                                   | CT     | 2.6612/465.89 | 0.0109 |
| S7                                                             | H-3→L (86%)                                                   | CT     | 2.6948/460.08 | 0.0013 |
| S10                                                            | H-5→L (70%); H-4→L+1 (16%)                                    | CT&DLE | 2.8491/435.17 | 0.0004 |
| S11                                                            | H-7→L+1 (10%); H-6→L (72%)                                    | CT&DLE | 2.9461/420.85 | 0.0460 |
| S12                                                            | H-2→L+1 (81%)                                                 | CT     | 2.9608/418.75 | 0.0009 |
| S13                                                            | H-3→L+1 (88%)                                                 | CT     | 3.0065/412.38 | 0.0065 |
| S14                                                            | H-7→L (66%); H-6→L+1 (14%)                                    | CT&DLE | 3.0153/411.19 | 0.0004 |
| S15                                                            | H-5→L (19%); H-4→L+1 (76%)                                    | CT&DLE | 3.1061/399.16 | 0.0002 |
| IO-4F ( $\omega=0.118, \varepsilon_s=3.5, \varepsilon_d=3.4$ ) |                                                               |        |               |        |
| S2                                                             | H→L+1 (98%)                                                   | DLE&CT | 2.4661/502.76 | 0.0008 |
| S3                                                             | H-1→L (94%)                                                   | DLE&CT | 2.8431/436.09 | 0.0009 |
| S4                                                             | H→L+2 (73%); H→L+3 (17%)                                      | CT     | 2.9477/420.61 | 0.0135 |
| S5                                                             | H→L+2 (17%); H→L+3 (73%)                                      | CT     | 2.9511/420.12 | 0.0000 |
| S6                                                             | H-2→L (90%)                                                   | CT     | 2.9863/415.17 | 0.0189 |
| S7                                                             | H-3→L (89%)                                                   | CT     | 3.0242/409.97 | 0.0030 |
| S9                                                             | H-11→L (39%); H-11→L+1 (19%); H-10→L (10%);<br>H-10→L+1 (11%) | CT&ALE | 3.0865/401.7  | 0.0001 |
| S10                                                            | H-11→L+1 (10%); H-10→L (39%); H-10→L+1 (19%)                  | CT&ALE | 3.0872/401.61 | 0.0089 |
| S12                                                            | H-5→L (71%); H-4→L+1 (11%)                                    | CT&DLE | 3.1649/391.75 | 0.0168 |
| S14                                                            | H-7→L (61%); H-6→L+1 (11%); H-2→L+1 (20%)                     | CT&DLE | 3.3218/373.24 | 0.0023 |
| S15                                                            | H-7→L (17%); H-2→L+1 (72%)                                    | CT&DLE | 3.3735/367.52 | 0.0000 |

**Table S6.** The lowest singlet excitation energy  $E_{S1}$ (eV), the lowest triplet excitation energy  $E_{T1}$ (eV), and singlet–triplet energy gap  $\Delta E_{ST}$  ( $\Delta E_{ST} = E_{S1} - E_{T1}$ ) for PM6 and NFAs calculated at the given  $\omega$  value (in Bohr<sup>-1</sup>), static and dynamic dielectric constants. (In the solid, LC-PBE/CEP-121G\*).

| molecule | $E_{S1}$ | $E_{T1}$ | $\Delta E_{ST}$ | $\omega$ | $\epsilon_s$ | $\epsilon_d$ |
|----------|----------|----------|-----------------|----------|--------------|--------------|
| PM6      | 2.4767   | 1.7650   | 0.7117          | 0.11     | 3.1          | 3.0          |
|          |          |          |                 | 8        |              |              |
| IM-4F    | 1.7800   | 1.2887   | 0.4913          | 0.11     | 3.8          | 3.4          |
|          |          |          |                 | 8        |              |              |
| IT-4F    | 1.8261   | 1.3122   | 0.5139          | 0.11     | 3.8          | 3.4          |
|          |          |          |                 | 8        |              |              |
| IO-4F    | 2.0658   | 1.4381   | 0.6277          | 0.11     | 3.5          | 3.4          |
|          |          |          |                 | 8        |              |              |

**Table S7.** Electronic transition energies (eV), excitation wavelengths (nm), corresponding oscillator strengths ( $f$ ), and main transition configurations for four monomer molecules. CT represent the charge transfer from the donor segment to the acceptor segment. DLE and ALE represent the local excitation that occurs on the donor segment and the acceptor segment. (In the solid phase, LC-PBE/CEP-121G\*).

| States                                                         | Main transition configurations                           | ESC    | E (eV/nm)     |
|----------------------------------------------------------------|----------------------------------------------------------|--------|---------------|
| PM6 ( $\omega=0.118$ , $\epsilon_s=3.1$ , $\epsilon_d=3.0$ )   |                                                          |        |               |
| T1                                                             | H→L (57%); H→L+4 (11%)                                   | LE     | 1.7650/702.45 |
| T2                                                             | H-1→L+1 (20%); H-1→L+5 (21%)                             | CT&DLE | 1.9665/630.47 |
| T3                                                             | H-3→L (13%); H→L+5 (12%)                                 | CT     | 2.0562/602.98 |
| IM-4F ( $\omega=0.118$ , $\epsilon_s=3.8$ , $\epsilon_d=3.4$ ) |                                                          |        |               |
| T1                                                             | H-1→L+1 (10%); H→L (79%)                                 | DLE&CT | 1.2887/962.12 |
| T2                                                             | H-1→L (29%); H→L+1 (56%)                                 | CT&DLE | 1.5176/816.96 |
| T3                                                             | H-1→L+1 (13%); H→L+2 (28%)                               | CT&DLE | 2.0476/605.50 |
| IT-4F ( $\omega=0.118$ , $\epsilon_s=3.8$ , $\epsilon_d=3.4$ ) |                                                          |        |               |
| T1                                                             | H-1→L+1 (10%); H→L (78%)                                 | DLE&CT | 1.3122/944.87 |
| T2                                                             | H-1→L (31%); H→L+1 (53%)                                 | CT&DLE | 1.5346/807.93 |
| T3                                                             | H-3→L+1 (10%); H-2→L (18%); H-1→L+1 (12%)<br>H→L+2 (25%) | DLE&CT | 2.0630/600.99 |
| IO-4F ( $\omega=0.118$ , $\epsilon_s=3.5$ , $\epsilon_d=3.4$ ) |                                                          |        |               |
| T1                                                             | H-1→L+1 (12%); H→L (79%)                                 | DLE&CT | 1.4381/862.14 |
| T2                                                             | H-1→L (35%); H→L+1 (53%)                                 | DLE&CT | 1.7032/727.94 |
| T3                                                             | H-4→L (16%); H-1→L+1 (27%); H→L+4 (21%)                  | DLE&CT | 2.4339/509.40 |

**Table S8.** Electronic transition energies(eV), corresponding oscillator strengths ( $f$ ),

excitation wavelengths(nm), excited states characters (ESC) and main transition configurations for complex molecules. (LC-PBE/CEP-121G\*).

| States                                                             | Main transition configurations                                           | ESC    | E(eV/nm)      | <i>f</i> |
|--------------------------------------------------------------------|--------------------------------------------------------------------------|--------|---------------|----------|
| PM6:IM-4F ( $\omega=0.118$ , $\epsilon_s=3.5$ , $\epsilon_d=3.2$ ) |                                                                          |        |               |          |
| S3                                                                 | H→L+1 (40%); H→L (36%)                                                   | CT     | 1.9642/631.22 | 0.0440   |
| S4                                                                 | H-1→L (50%); H→L+1 (14%); H-1→L+1 (13%)                                  | CT     | 1.9999/619.95 | 0.0422   |
| S5                                                                 | H-2→L+1 (81%); H-1→L+1 (10%)                                             | ALE    | 2.1071/588.41 | 0.0065   |
| S6                                                                 | H→L+2 (53%); H→L+3 (31%)                                                 | CT     | 2.1489/576.97 | 0.5579   |
| S7                                                                 | H-3→L (28%); H-1→L (20%); H-1→L+1 (17%);<br>H-3→L+1 (13%)                | CT     | 2.1996/563.67 | 0.0567   |
| S8                                                                 | H-1→L+1 (48%); H-3→L (27%)                                               | CT     | 2.2642/547.59 | 0.0017   |
| S10                                                                | H-4→L (48%); H-3→L (19%); H-4→L+1 (17%)                                  | CT     | 2.4071/515.08 | 0.0040   |
| S11                                                                | H→L+5 (63%); H-2→L+2 (18%)                                               | CT&DLE | 2.4178/512.80 | 0.0271   |
| S12                                                                | H-2→L+2 (63%); H-1→L+2 (15%); H→L+5 (11%)                                | CT&ALE | 2.4334/509.51 | 0.2550   |
| S13                                                                | H-3→L+1 (57%); H-3→L (15%); H-4→L (13%)                                  | CT     | 2.4888/498.17 | 0.0108   |
| S14                                                                | H-2→L+3 (63%); H-1→L+3 (17%)                                             | CT&ALE | 2.5197/492.06 | 0.0068   |
| S15                                                                | H-1→L+2 (40%); H-2→L+3 (15%); H-1→L+3 (12%)                              | CT     | 2.5362/488.86 | 0.0366   |
| PM6:IT-4F ( $\omega=0.118$ , $\epsilon_s=3.5$ , $\epsilon_d=3.2$ ) |                                                                          |        |               |          |
| S3                                                                 | H→L+1 (41%); H→L (36%); H-1→L (10%)                                      | CT     | 1.9445/637.61 | 0.0651   |
| S4                                                                 | H-1→L (59%); H→L+1 (14%); H-1→L+1 (12%)                                  | CT     | 1.9817/625.65 | 0.0596   |
| S5                                                                 | H→L+2 (36%); H→L+3 (28%); H-2→L+1 (12%)                                  | CT&ALE | 2.1388/579.69 | 0.3535   |
| S6                                                                 | H-2→L+1 (55%); H→L+2 (12%); H→L+3 (10%)                                  | CT&ALE | 2.1550/575.33 | 0.2103   |
| S7                                                                 | H-2→L+1 (26%); H-3→L (22%); H-1→L+1 (15%);<br>H-1→L (14%); H-3→L+1 (11%) | CT&ALE | 2.1858/567.23 | 0.0395   |
| S8                                                                 | H-1→L+1 (54%); H-3→L (27%)                                               | CT     | 2.2452/552.22 | 0.0022   |
| S10                                                                | H-4→L (50%); H-3→L (20%); H-4→L+1 (17%)                                  | CT     | 2.3843/520.00 | 0.0016   |
| S11                                                                | H→L+5 (63%); H-2→L+2(18%)                                                | CT&DLE | 2.4178/512.80 | 0.0271   |
| S12                                                                | H-3→L+1 (56%); H-3→L (14%); H-4→L (13%)                                  | CT     | 2.4687/502.22 | 0.0014   |
| S13                                                                | H-2→L+2 (83%)                                                            | CT&ALE | 2.4821/499.51 | 0.2252   |
| S14                                                                | H-1→L+2 (44%); H-1→L+3 (27%); H→L+5 (10%)                                | CT     | 2.5263/490.77 | 0.0510   |
| S15                                                                | H→L+3 (50%); H→L+2 (41%)                                                 | CT     | 2.5403/488.07 | 0.0008   |
| PM6:IO-4F ( $\omega=0.118$ , $\epsilon_s=3.3$ , $\epsilon_d=3.2$ ) |                                                                          |        |               |          |
| S3                                                                 | H-1→L (49%); H-2→L (32%)                                                 | CT&ALE | 2.2271/556.71 | 0.0737   |
| S4                                                                 | H→L+2 (29%); H→L+3 (24%); H→L+1 (22%)                                    | CT&DLE | 2.2985/539.41 | 1.0766   |
| S6                                                                 | H→L+3 (50%); H→L+2 (34%)                                                 | CT&DLE | 2.3892/518.94 | 0.2429   |
| S7                                                                 | H-2→L+1 (49%); H-1→L+1 (39%)                                             | ALE    | 2.4640/503.18 | 0.0598   |
| S8                                                                 | H-3→L (62%)                                                              | CT     | 2.4803/499.88 | 0.0077   |
| S9                                                                 | H-1→L+1 (41%); H-2→L+1 (28%); H-3→L (15%)                                | CT     | 2.5738/481.72 | 0.0028   |
| S10                                                                | H-2→L+2 (51%); H-1→L+2 (31%)                                             | CT     | 2.5879/479.09 | 0.0308   |
| S11                                                                | H-1→L+3 (47%); H-2→L+3 (32%)                                             | CT     | 2.6279/471.80 | 0.0256   |
| S12                                                                | H-1→L+2 (35%); H-2→L+2 (20%); H→L+5 (16%)                                | CT     | 2.6429/469.12 | 0.1450   |
| S13                                                                | H→L+5 (20%); H-2→L+3 (17%); H-1→L+2 (14%);<br>H-2→L+2 (10%)              | CT     | 2.6811/462.44 | 0.1236   |
| S14                                                                | H-4→L (57%); H-5→L (13%); H-4→L+1 (10%)                                  | CT     | 2.7126/457.07 | 0.0150   |

**Table S9.** Calculated ionization potentials of the donors  $IP_D$ , electron affinities of the acceptor  $EA_A$ , fundamental gaps defined as the difference between the ionization energy of donor and the electron affinity of acceptor ( $IP_D - EA_A$ ), first adiabatic excitation energy of acceptor  $E_{s1A}$ , quality center distances  $D_{D-A}$  (Å) between donor and acceptor of the complexes. (LC-PBE/CEP-121G\*).

| Complex   | $IP_D$ | $EA_A$ | $IP_D - EA_A$ | $E_{s1A}$ | $D_{D-A}$ |
|-----------|--------|--------|---------------|-----------|-----------|
| PM6:IM-4F | 5.53   | 3.68   | 1.85          | 1.66      | 10.23     |
| PM6:IT-4F | 5.53   | 3.69   | 1.84          | 1.71      | 10.25     |
| PM6:IO-4F | 5.53   | 3.28   | 2.25          | 1.94      | 8.55      |

**Table S10.** Calculated electronic coupling  $V$  (in eV) in CR process of PM6:IM-4F, PM6:IT-4F and PM6:IO-4F complexes.  $u$  corresponds the transition dipole moment (in a.u);  $\mu_g$  and  $\mu_e$  represent the dipole moment at the ground state and excited state (in Debye), respectively.  $\Delta\mu_{ge}$  indicates the change in dipole moment between the ground state and the lowest singlet excited state (in Debye);  $\Delta E$  is the energy difference between the ground state and the excited state (in eV). (LC-PBE/CEP-121G\*).

|                                                                                                          |       | PM6:IM-4F | PM6:IT-4F | PM6:IO-4F |
|----------------------------------------------------------------------------------------------------------|-------|-----------|-----------|-----------|
| $u$                                                                                                      | $X$   | 0.7907    | -0.763    | -1.0558   |
|                                                                                                          | $Y$   | -0.4866   | -0.3936   | -0.4821   |
|                                                                                                          | $Z$   | -0.0011   | 0.0053    | 0.0285    |
| $U_g$                                                                                                    | $X_1$ | -0.7999   | 0.9580    | 0.4834    |
|                                                                                                          | $Y_1$ | -2.8308   | -2.6212   | -0.1132   |
|                                                                                                          | $Z_1$ | 3.2788    | -3.6484   | 2.6678    |
| $U_e$                                                                                                    | $X_2$ | -5.8640   | 6.6464    | -9.5524   |
|                                                                                                          | $Y_2$ | -17.2949  | -16.6288  | -7.3863   |
|                                                                                                          | $Z_2$ | -5.0853   | 4.9020    | -0.0104   |
| $u$                                                                                                      |       | 25.26     | 23.36     | 31.59     |
| $\Delta\mu_{ge}$                                                                                         |       | 186.89    | 185.93    | 135.74    |
| $\Delta E$                                                                                               |       | 1.61      | 1.59      | 1.94      |
| $V_{CR}$                                                                                                 |       | 0.21      | 0.19      | 0.41      |
| $\Delta\mu_{ge} = \sqrt{(X_2 - X_1)^2 + (Y_2 - Y_1)^2 + (Z_2 - Z_1)^2} \quad u = \sqrt{X^2 + Y^2 + Z^2}$ |       |           |           |           |

**Table S11.** Electronic coupling  $V$  (in meV) in CT and ED process of PM6:IM-4F, PM6:IT-4F and PM6:IO-4F complexes.  $E_i$  and  $E_f$  are the energy (in eV) of initial and final states;  $S_{if}$  corresponds the overlap matrix element, and  $H_{if}$  (meV) is the off-diagonal Hamiltonian of charge-localized state. (LC-PBE/CEP-121G\*).



| <b>Complex</b> | <b>ETP</b>   | <b>H<sub>if</sub></b> | <b>S<sub>if</sub></b> | <b>E<sub>i</sub></b> | <b>E<sub>f</sub></b> | <b>V</b>  |
|----------------|--------------|-----------------------|-----------------------|----------------------|----------------------|-----------|
| PM6:IM-4F      | CT D(H)→A(L) | -98.68338             | -0.02327              | 2.54788              | 2.43754              | -40.67635 |
|                | ED A(H)→D(H) | 4.37013               | -0.00500              | -2.54890             | -2.68874             | 17.45277  |
| PM6:IT-4F      | CT D(H)→A(L) | 54.46841              | -0.00833              | 2.54368              | 2.77452              | 76.61877  |
|                | ED A(H)→D(H) | -11.78004             | -0.00701              | -2.54309             | -2.71864             | 6.65593   |
| PM6:IO-4F      | CT D(H)→A(L) | -44.91965             | 0.01129               | 2.53254              | 3.07913              | -76.59989 |
|                | ED A(H)→D(H) | 100.55886             | -0.01042              | -2.53302             | -2.74840             | 128.07479 |
